# Supplementary material
Source: publisher figshare collection journal article supplement (https://tandf.figshare.com/articles/dataset/_/24634817)
Supplement: Supplementary file 1 [file 1]

Lei Chen received his Ph.D. degree in electrical and electronic engineering from Nanyang Technological University, Singapore. Now he is an AI algorithm expert in Midea, China. His research interests include artificial neural networks, deep learning, computer vision and machine learning, etc.

Yilin Wang is currently pursuing the B.Sc. degree in College of Aeronautics and Astronautics at Shenyang Aerospace University, China. Her research interest is mechanical manufacturing, neural networks and machine learning.

Yunhe Wu received her M.S. degree in information Science and Technology from Northeast Normal University. She is currently pursuing the Ph.D degree in information science and engineering at Northeastern University. Her research interest is computer vision.

Lixiao Zhang received his Ph.D. degree in Electronics and Computer Technology from the Free University of Brussels. Now he is a director in Midea, China. His research interests include neural networks, deep learning, computer vision, millimeter wave imaging and communication technology.
